# Supplementary material
Source: Royal Society of Chemistry journal article supplement (doi:10.1039/d6tc00248j)
Supplement: d6tc00248j1.pdf [file d6tc00248j1.pdf]

## Supplementary Information

### Surface Transfer n-Type Doping of Graphene Using WO<sub>3</sub> Nanoparticles prepared without the use of hazardous chemicals

Visheshvar Verma<sup>a</sup>, Avinash Mahapatra<sup>b</sup>, Rajesh Kumar Sahu<sup>c,d</sup>, Ram Sevak Singh<sup>e</sup>, Atikur Rahman<sup>b</sup>, Mukul Gupta<sup>f</sup>, Soma Banik<sup>c,d</sup>, and Arun Kumar Singh<sup>a\*</sup>

<sup>a</sup>*Department of Pure and Applied Physics, Guru Ghasidas Vishwavidyalaya, Bilaspur (C.G.)-495009, India.*

<sup>b</sup>*Department of Physics, Indian Institute of Science Education and Research (IISER)-Pune Dr. Homi Bhabha Road, Pune, Maharashtra 411008, India.*

<sup>c</sup>*Accelerator Physics and Synchrotrons Utilization Division, Raja Ramanna Centre for Advanced Technology, Indore 452013, India*

<sup>d</sup>*Homi Bhabha National Institute, Training School Complex, Anushakti Nagar, Mumbai 400094, India*

<sup>e</sup>*Department of Physics, OP Jindal University, Raigarh, Chhattisgarh-496109, India.*

<sup>f</sup>*UGC-DAE Consortium for Scientific Research, University Campus, Khandwa Road, Indore 452001, India.*

\*Corresponding Author: [arunsingh.itbhu@gmail.com](mailto:arunsingh.itbhu@gmail.com)

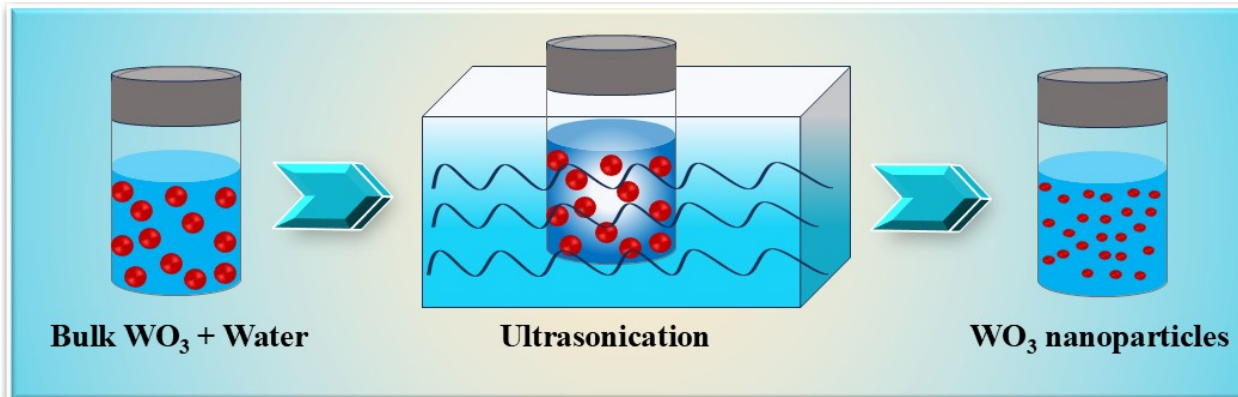

Figure S1. Schematic diagram for the preparation of the  $\text{WO}_3$  nanoparticles.

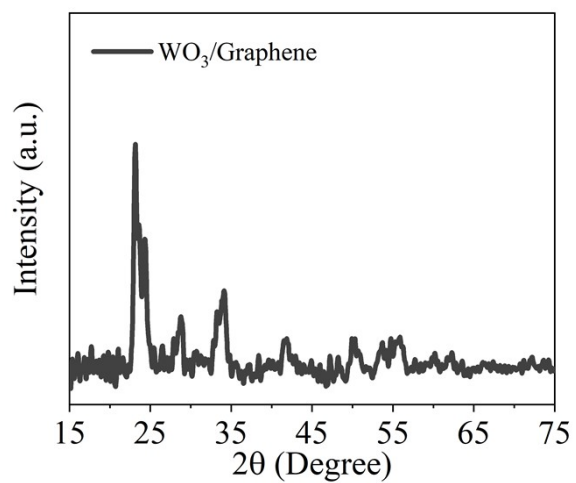

Figure S2. XRD pattern of  $\text{WO}_3$  nanoparticles on graphene.

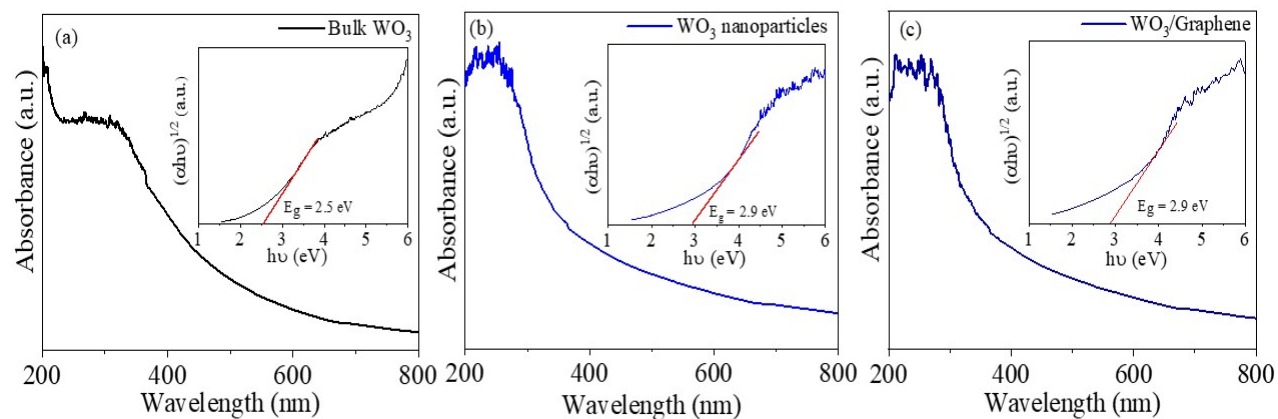

Figure S3. UV-Vis spectra of (a) bulk  $\text{WO}_3$ , (b)  $\text{WO}_3$  nanoparticles, and (c)  $\text{WO}_3$  nanoparticles on CVD graphene. Inset showing Tauc's plot of corresponding spectra.

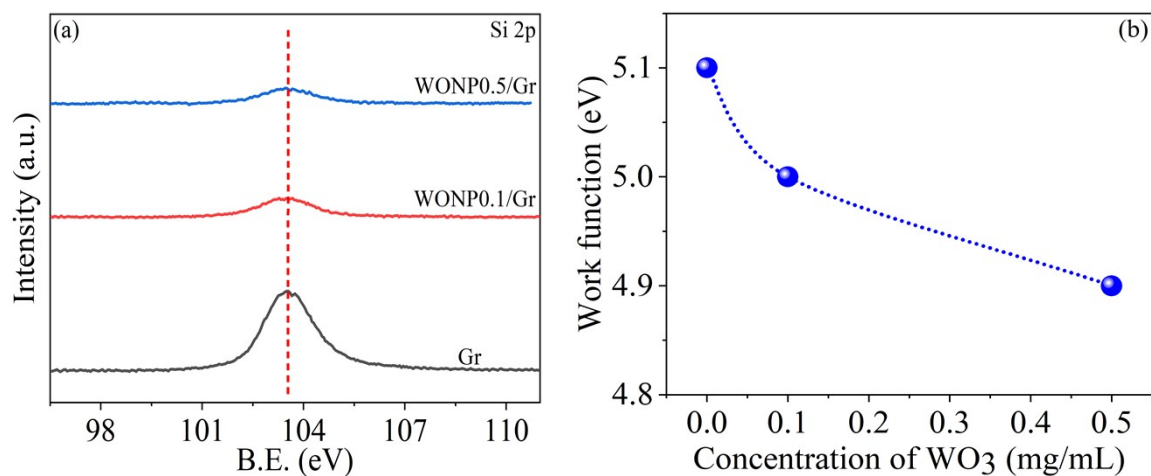

Figure S4. (a) Si 2p core level spectra of pristine graphene (Gr), 0.1 mg/mL  $\text{WO}_3$  doped graphene (WONP0.1/Gr) and 0.5 mg/mL  $\text{WO}_3$  doped graphene (WONP0.5/Gr). (b) Work function of graphene with increasing concentration of dopant ( $\text{WO}_3$ ).
